# Supplementary material for: C-terminally mutated tubby protein accumulates in aggresomes
Source: PubMed Central journal article supplement — BMB Rep. 2017 Jan 31;50(1):37–42. doi: 10.5483/BMBRep.2017.50.1.140 (PMC5319663; doi:10.5483/bmbrep.2017.50.1.140), 2017-01-31
Supplement: bmb-50-037_suppl.pdf [file bmb-50-037_suppl.pdf]

**Figure S1. The C-terminal region of the tubby protein is essential for its Tx-100 solubility.**

(A) COS-7 cells were transfected with constructs encoding Flag-tagged tubby proteins. At 48 h post-transfection, the cells were lysed and separated into Tx-100 soluble (supernatant) and insoluble (pellet) fractions. The fractions and total lysates were analyzed by Western blotting using anti-Flag and anti-actin antibodies. (B) Tubby, mutant tubby, and truncated proteins were cloned into the pRSET C vector and expressed in BL21 cells. At 24 h after induction with 0.1 mM isopropyl  $\beta$ -D-1-thiogalactopyranoside (IPTG), cells were lysed and separated into Tx-100 soluble and insoluble fractions. The fractions and total lysates were analyzed by Coomassie brilliant blue (CBB) staining.

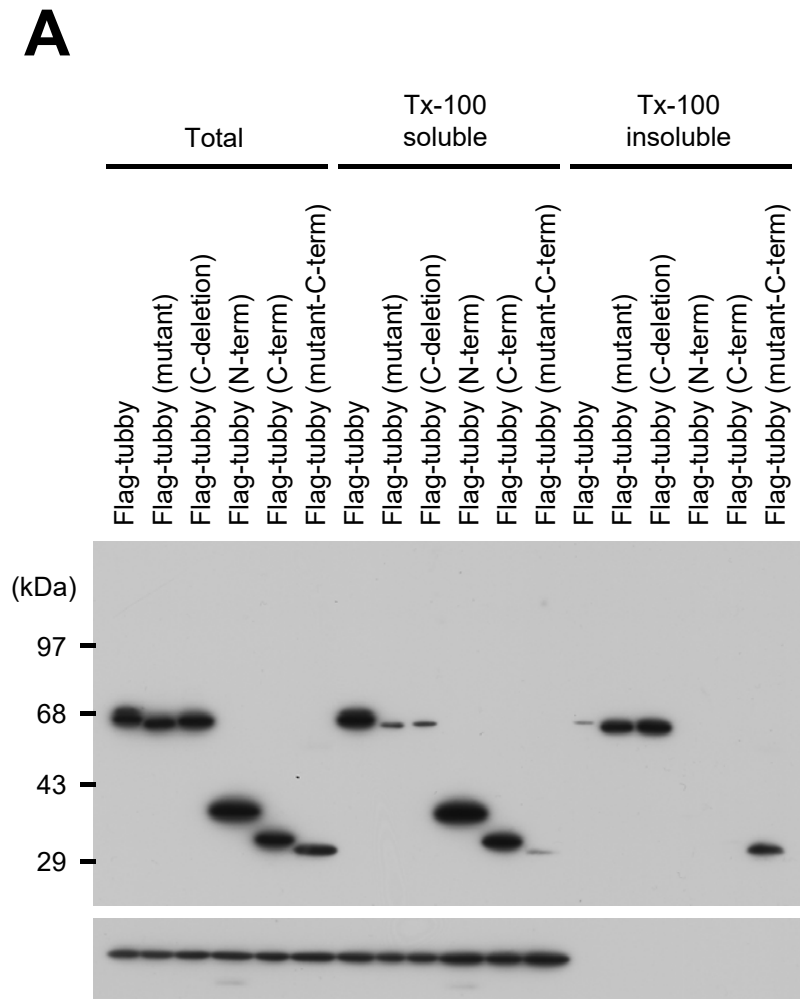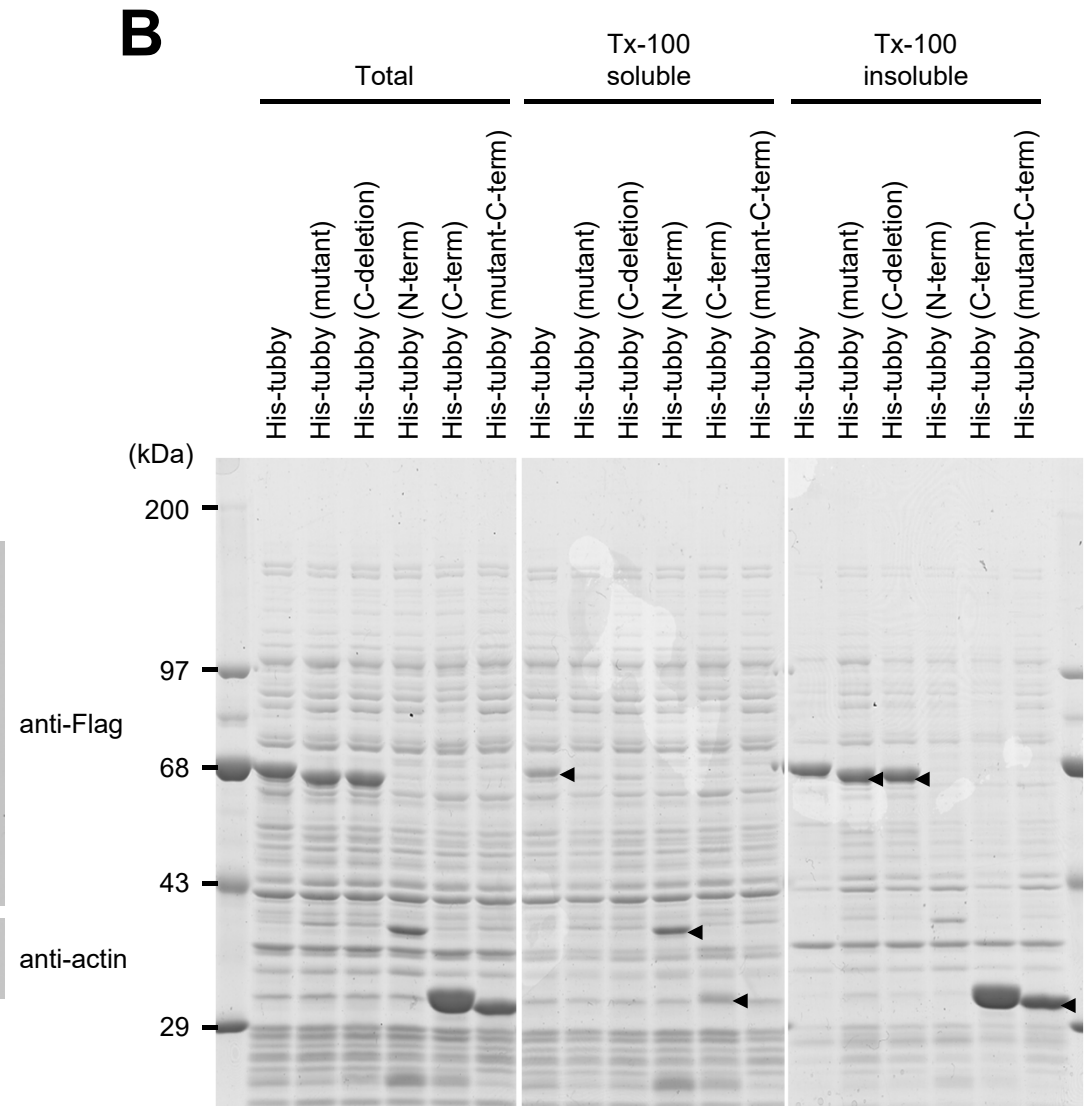

**Fig. S1. Kim, S. et al.**
